# Supplementary material for: Tolerogenic Effect Elicited by Protein Fraction Derived From Different Formulas for Dietary Treatment of Cow’s Milk Allergy in Human Cells
Source: PubMed Central journal article supplement (PMC7928417; doi:10.3389/fimmu.2020.604075), 2021-02-12

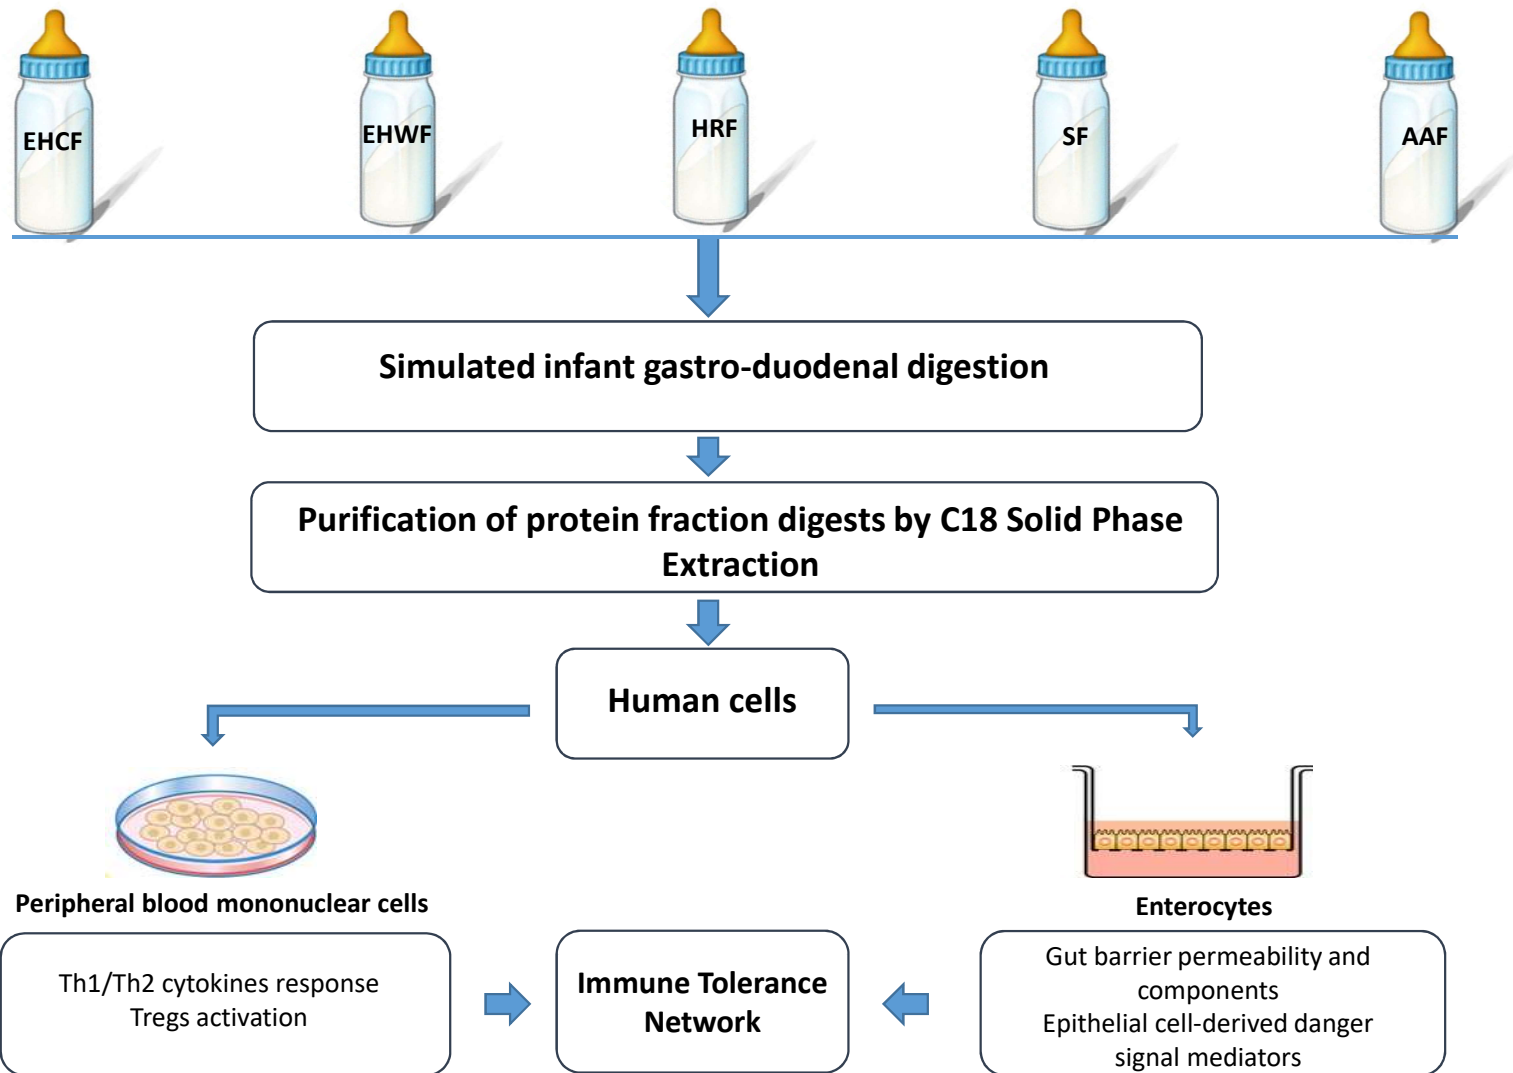

Supplement: DataSheet_1.pdf [file DataSheet_1.pdf]
